# Supplementary material for: Evaluation of Antimicrobial, Enzyme Inhibitory, Antioxidant and Cytotoxic Activities of Partially Purified Volatile Metabolites of Marine Streptomyces sp.S2A
Source: PubMed Central journal article supplement (PMC6163298; doi:10.3390/microorganisms6030072), 2018-07-18
Supplement: microorganisms-06-00072-s001.pdf [file microorganisms-06-00072-s001.pdf]

1 **Supplementary Information**

2  
3 **Evaluation of Antimicrobial, Enzyme Inhibitory, Antioxidant and**  
4 **Cytotoxic Activities of Partially Purified Volatile Metabolites of Marine**  
5 ***Streptomyces* sp.S2A**

6 **Saket Siddharth and Ravishankar Rai V\***

7 Department of studies in Microbiology, University of Mysore, Manasagangotri, Mysore –  
8 570006, INDIA

9  
10 \*Correspondence: Ravishankar Rai V, Department of Studies in Microbiology, University of  
11 Mysore, Manasagangotri, Mysore - 570 006, India. Tel: +91821-2419441; E-mail:  
12 saketsiddharth@gmail.com; raivittal@gmail.com

13  
14  
15  
16  
17  
18  
19  
20  
21  
22  
23  
24  
25  
26  
27  
28  
29  
30  
31  
32  
33  
34  
35  
36  
37  
38  
39

40 **Contents:**

41

42 **Figure S1.** Antimicrobial activity of the bioactive extract of the *Streptomyces* sp.S2A on  
43 pathogens. (A) *Escherichia coli* (B) *Klebsiella pneumoniae* (C) *Micrococcus luteus* (D)  
44 *Bacillus cereus* (E) *Staphylococcus aureus* (F) *Staphylococcus epidermidis* (G) *Bipolaris*  
45 *maydis* (H) *Fusarium moniliforme*.

46

47 **Figure S2.** Cytotoxic effect of extract against (A) HT-29 (B) MDA (C) U-87 MG.  
48 Morphological studies show that after treatment with extract, cells shrunk with the formation  
49 of crystals and detached from the surface.

50

51 **Figure S3.** GC-Mass spectrum of pyrrolo[1,2-a]pyrazine-1,4-dione,hexahydro-3-(2-  
52 methylpropyl).

53

54 **Figure S4.** Gas chromatographic spectra of the active extract of *Streptomyces* sp.S2A.

55

56 **Figure S5.** Cytotoxic effect of pyrrolo[1,2-a]pyrazine-1,4-dione,hexahydro-3-(2-  
57 methylpropyl) (Commercial compound) against (A) HT-29 (B) MDA (C) U-87 MG.  
58 Morphological studies show that after treatment with compound, cells shrunk with the  
59 formation of crystals and detached from the surface significantly.

60

61 **Figure S6.** Mass spectrum of pyrrolo[1,2-a]pyrazine-1,4-dione,hexahydro-3-(2-  
62 methylpropyl) (Commercial compound).

63

64 **Table S1.** Antimicrobial activity and MIC ( $\mu\text{g/mL}$ ) of pyrrolo[1,2-a]pyrazine-1,4-  
65 dione,hexahydro-3-(2-methylpropyl) (Commercial compound) by broth dilution method.

66

67 **Table S2.**  $\alpha$ -glucosidase inhibition and IC<sub>50</sub> values of pyrrolo[1,2-a]pyrazine-1,4-  
68 dione,hexahydro-3-(2-methylpropyl) (Commercial compound).

69

70 **Table S3.**  $\alpha$ -amylase inhibition and IC<sub>50</sub> values of pyrrolo[1,2-a]pyrazine-1,4-  
71 dione,hexahydro-3-(2-methylpropyl) (Commercial compound).

72

73

74

75

76

77

78

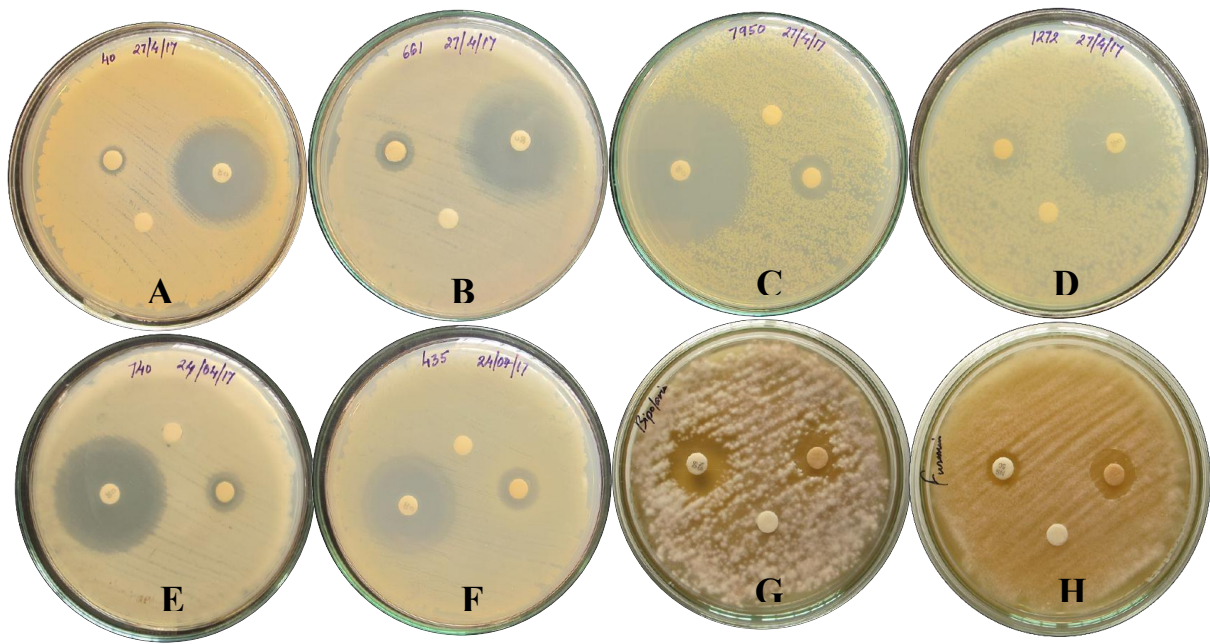

80

81

82 **Figure S1.** Antimicrobial activity of the bioactive extract of the *Streptomyces* sp. on pathogens. **(A)**

83 *Escherichia coli* **(B)** *Klebsiella pneumoniae* **(C)** *Micrococcus luteus* **(D)** *Bacillus cereus* **(E)** *Staphylococcus*

84 *aureus* **(F)** *Staphylococcus epidermidis* **(G)** *Bipolaris maydis* **(H)** *Fusarium moniliforme*.

85

86

87

88

89

90

91

92

93

94

95

96

97

98

99

100

101

102

103

104

105

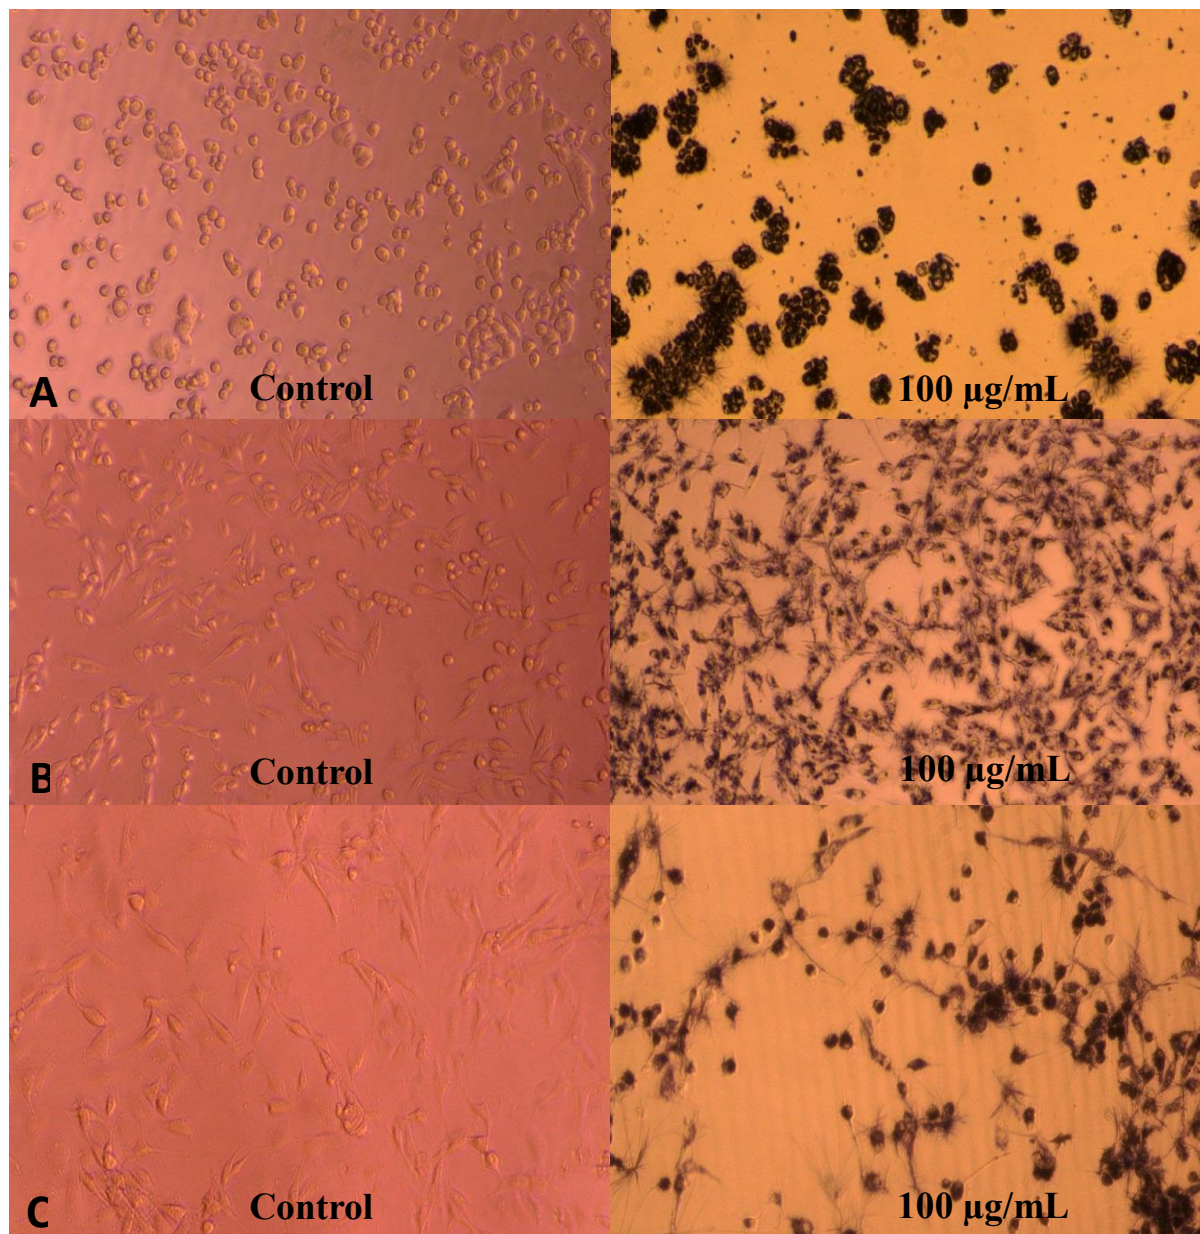

107

108

109 **Figure S2.** Cytotoxic effect of extract against (A) HT-29 (B) MDA (C) U-87 MG. Morphological studies  
110 show that after treatment with extract, cells shrunk with the formation of crystals and detached from  
111 the surface.

112

113

114

115

F-35-37-(17ES-0428)3756 (21.586)

Scan EI+  
9.08e6

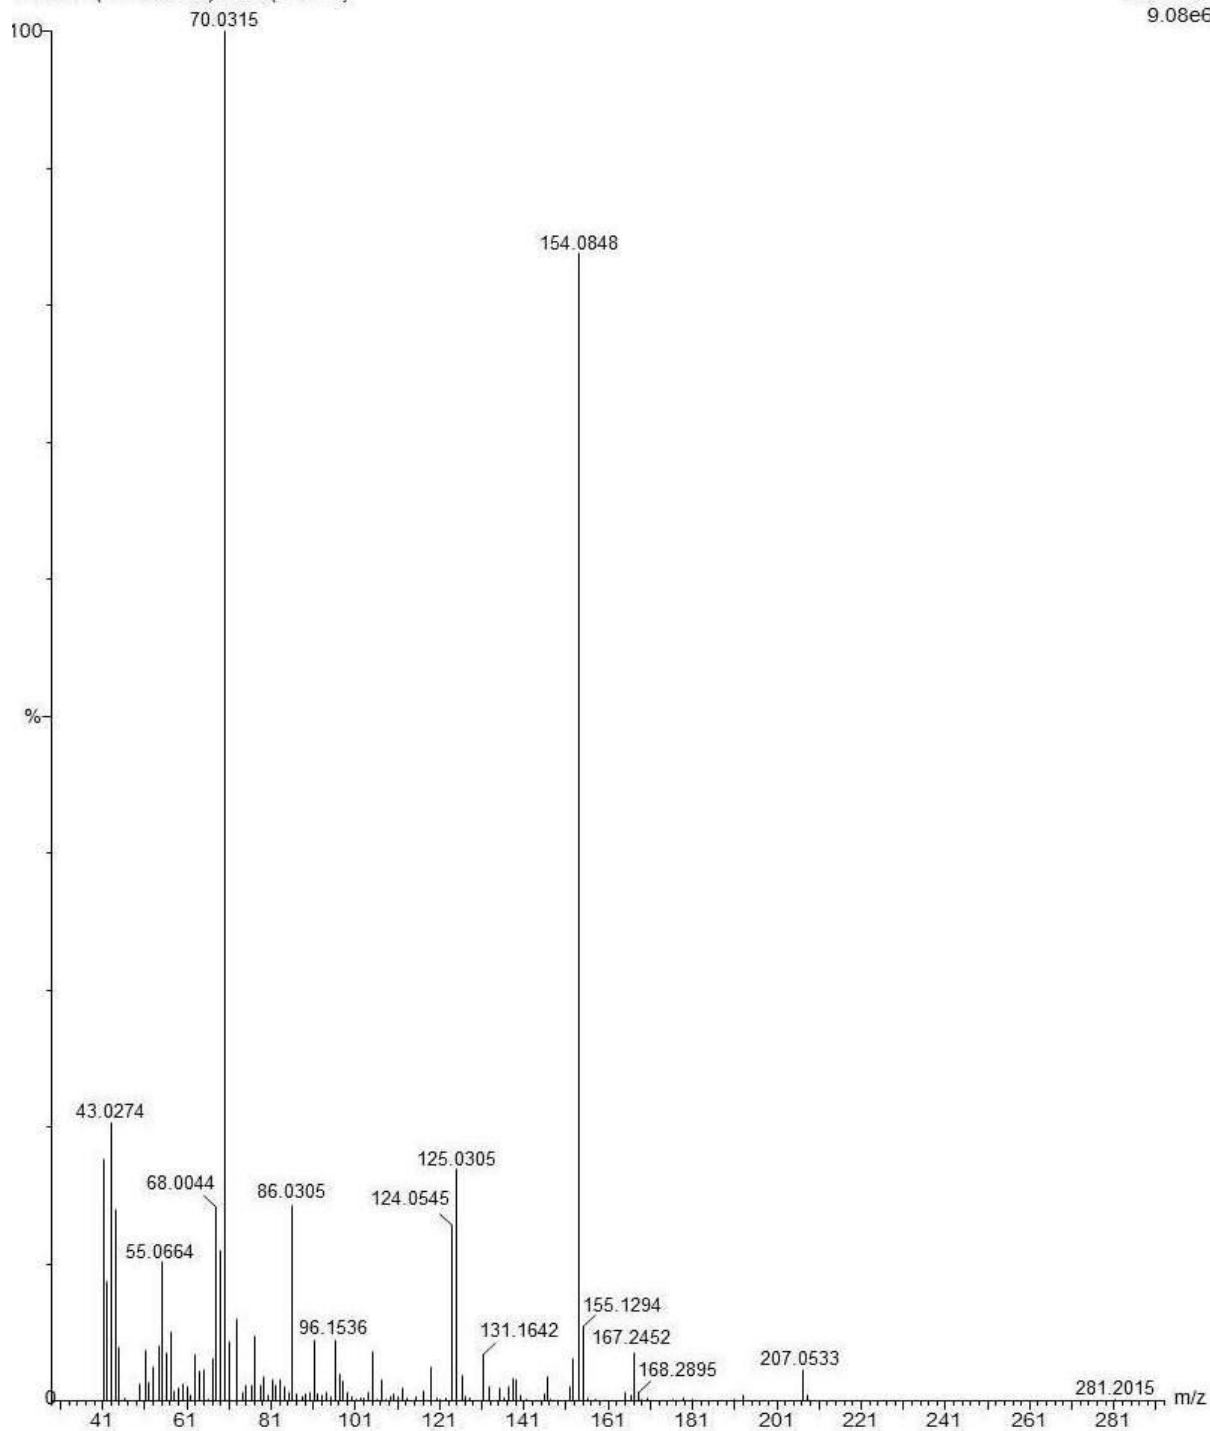

116

117

118

**Figure S3.** GC-Mass spectrum of pyrrolo[1,2-a]pyrazine-1,4-dione,hexahydro-3-(2-methylpropyl).

119

120

121

122

123

124

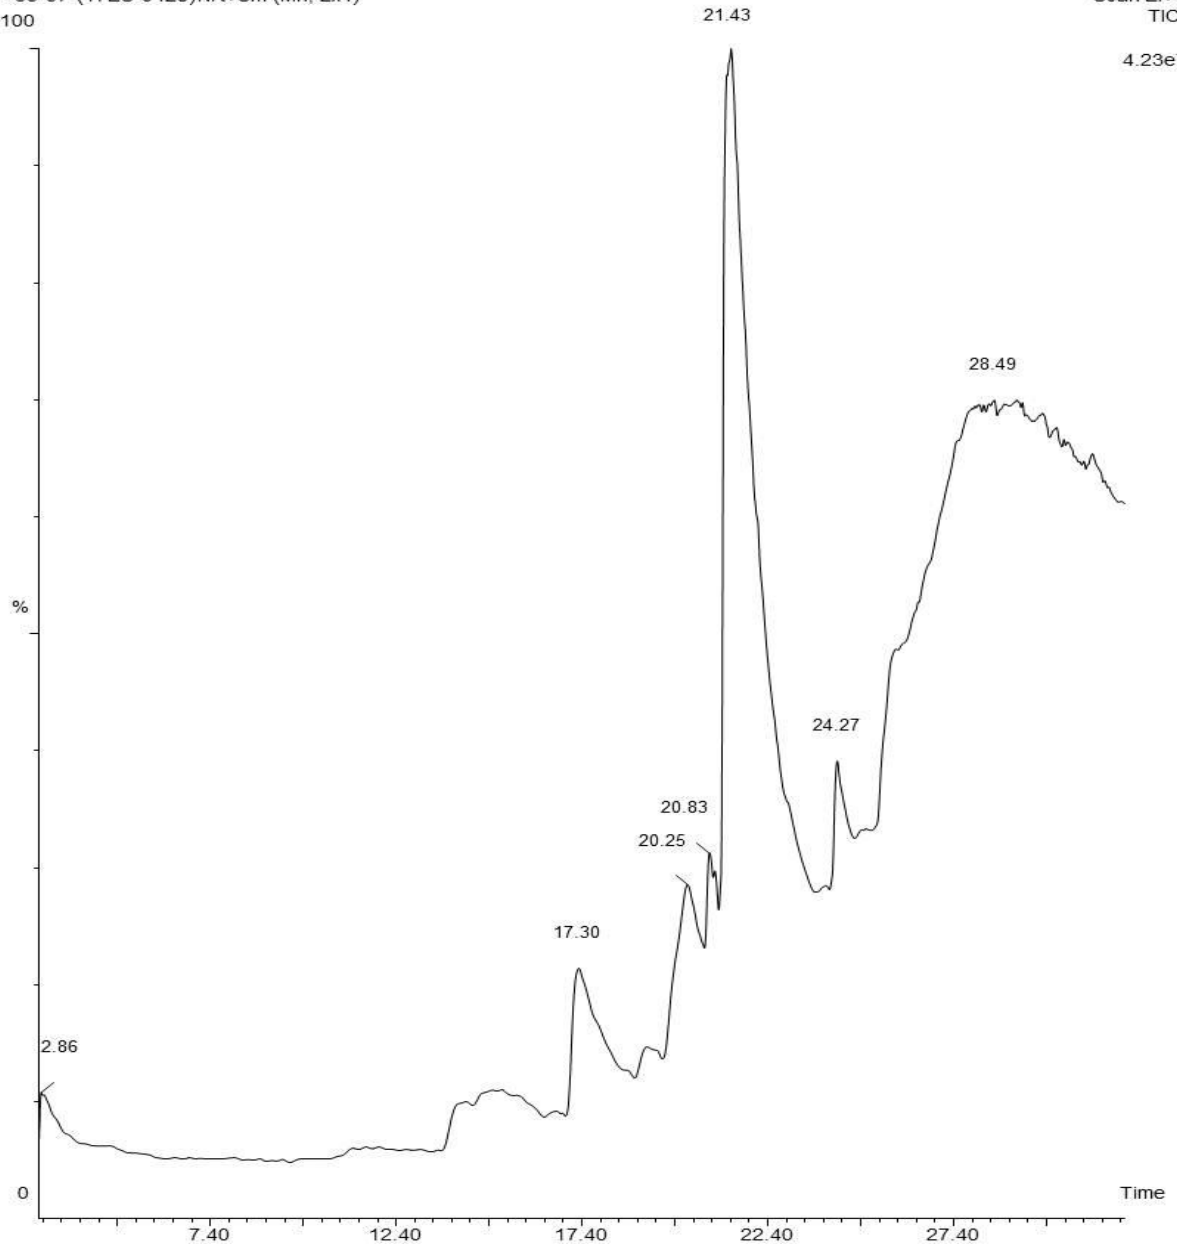

125

126

127

**Figure S4.** Gas chromatographic spectra of the active extract of *Streptomyces* sp.S2A.

128

129

130

131

132

133

134

135

136

137



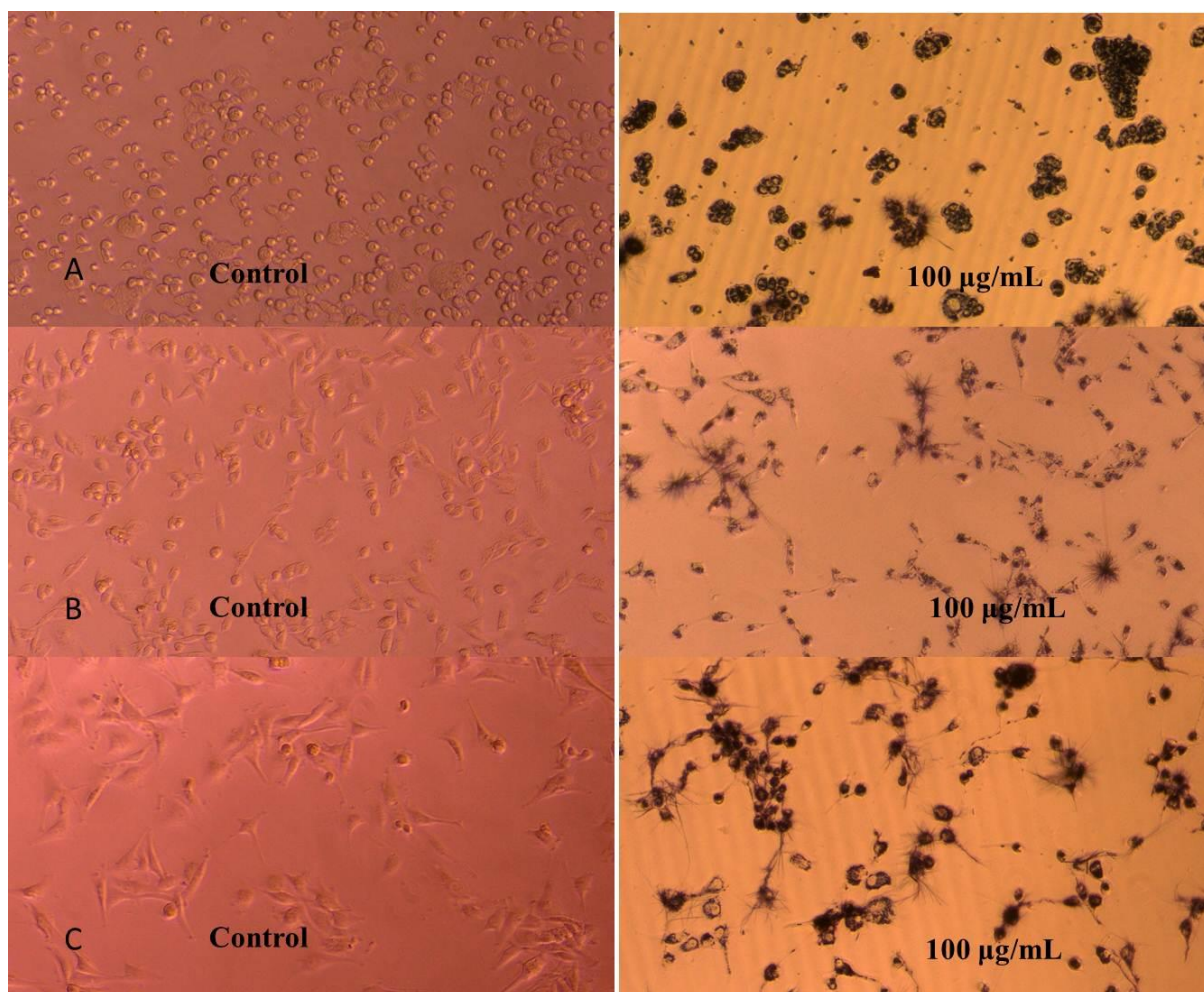

138

139

140

141

**Figure S5.** Cytotoxic effect of pyrrolo[1,2-a]pyrazine-1,4-dione,hexahydro-3-(2-methylpropyl) (Commercial compound) against (A) HT-29 (B) MDA (C) U-87 MG. Morphological studies show that after treatment with compound, cells shrunk with the formation of crystals and detached from the surface significantly.

F-35-37-(17ES-0428)3864 (22.126)

Scan EI+  
4.63e6

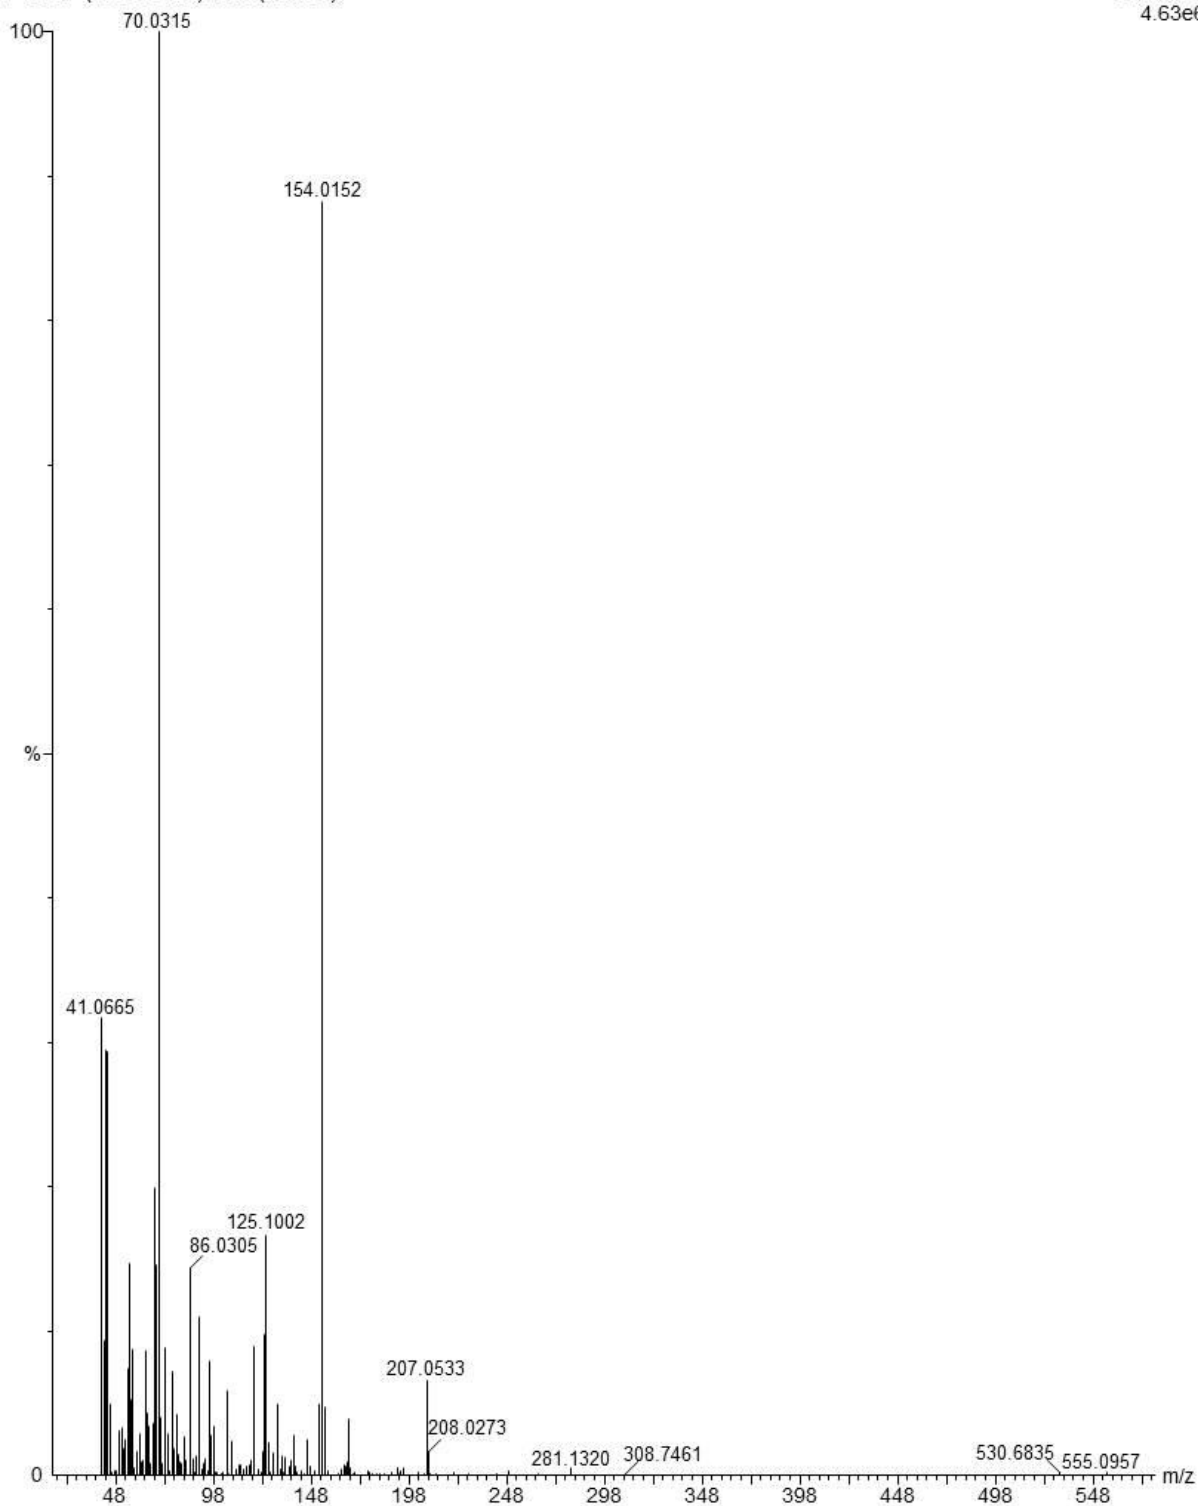

142

143

144

145

146

147

**Figure S6.** Mass spectrum of pyrrolo[1,2-a]pyrazine-1,4-dione,hexahydro-3-(2-methylpropyl)  
(Commercial compound)



148 **Table S1.** Antimicrobial activity and MIC ( $\mu\text{g/mL}$ ) of pyrrolo[1,2-a]pyrazine-1,4-dione,hexahydro-3-  
 149 (2-methylpropyl) (Commercial compound)by broth dilution method.

| Test microorganisms                        | Zone of inhibition (mm)    |                                      | MIC ( $\mu\text{g/mL}$ ) |
|--------------------------------------------|----------------------------|--------------------------------------|--------------------------|
| <b>Bacteria</b>                            | <b>Commercial compound</b> | <b>Antibiotics (Chloramphenicol)</b> |                          |
| <i>Klebsiella pneumoniae</i> MTCC 661      | 20 $\pm$ 1.2               | 28 $\pm$ 0.6                         | 7.81                     |
| <i>Micrococcus luteus</i> MTCC 7950        | 19 $\pm$ 0.2               | 24 $\pm$ 0.4                         | 1.95                     |
| <i>Escherichia coli</i> MTCC 40            | 21 $\pm$ 0.4               | 22 $\pm$ 1.6                         | -                        |
| <i>Bacillus cereus</i> MTCC 1272           | 16 $\pm$ 0.9               | 28 $\pm$ 1.7                         | -                        |
| <i>Staphylococcus epidermidis</i> MTCC 435 | 16 $\pm$ 0.8               | 20 $\pm$ 1.8                         | 3.90                     |
| <i>Staphylococcus aureus</i> MTCC 740      | 22 $\pm$ 1.4               | 30 $\pm$ 0.6                         | 3.90                     |
| <b>Fungi</b>                               |                            | <b>(Nystatin)</b>                    |                          |
| <i>Aspergillus flavus</i> MTCC 2590        | -                          | -                                    | -                        |
| <i>Bipolaris maydis</i>                    | -                          | -                                    | -                        |
| <i>Alternaria alternata</i> MTCC 1362      | -                          | -                                    | -                        |
| <i>Fusarium moniliforme</i> MTCC 6576      | 14 $\pm$ 1.0               | 20 $\pm$ 0.7                         | 62.50                    |

150

151 **Table S2.**  $\alpha$ -glucosidase inhibition and IC<sub>50</sub> values of pyrrolo[1,2-a]pyrazine-1,4-  
 152 dione,hexahydro-3-(2-methylpropyl) (Commercial compound)

| Concentration ( $\mu\text{g/ml}$ ) | Inhibition % (Commercial compound) | IC <sub>50</sub> ( $\mu\text{g/ml}$ ) (Commercial compound) | Inhibition % (Acarbose) | IC <sub>50</sub> ( $\mu\text{g/ml}$ ) (Acarbose) |
|------------------------------------|------------------------------------|-------------------------------------------------------------|-------------------------|--------------------------------------------------|
| 6.25                               | 14.11 $\pm$ 2.16                   |                                                             | 30.21 $\pm$ 0.33        |                                                  |
| 12.5                               | 16.03 $\pm$ 1.90                   |                                                             | 41.01 $\pm$ 0.62        |                                                  |
| 25                                 | 23.90 $\pm$ 0.64                   | 117.80                                                      | 61.74 $\pm$ 1.51        | 17.91                                            |
| 50                                 | 38.12 $\pm$ 1.10                   |                                                             | 70.02 $\pm$ 1.12        |                                                  |
| 100                                | 48.23 $\pm$ 1.01                   |                                                             | 84.83 $\pm$ 2.36        |                                                  |
| 200                                | 61.22 $\pm$ 0.13                   |                                                             | 88.63 $\pm$ 2.33        |                                                  |

153 **Table S3.**  $\alpha$ -amylase inhibition and IC<sub>50</sub> values of pyrrolo[1,2-a]pyrazine-1,4-dione,hexahydro-3-  
 154 (2-methylpropyl) (Commercial compound)

| Concentration ( $\mu\text{g/ml}$ ) | Inhibition % (Commercial compound) | IC <sub>50</sub> ( $\mu\text{g/ml}$ ) (Commercial compound) | Inhibition % (Acarbose) | IC <sub>50</sub> ( $\mu\text{g/ml}$ ) (Acarbose) |
|------------------------------------|------------------------------------|-------------------------------------------------------------|-------------------------|--------------------------------------------------|
|                                    | <b>EA extract</b>                  |                                                             | <b>Acarbose</b>         |                                                  |
| 6.25                               | 5.30 $\pm$ 0.91                    |                                                             | 16.43 $\pm$ 1.18        |                                                  |
| 12.5                               | 16.32 $\pm$ 0.37                   |                                                             | 31.30 $\pm$ 0.60        |                                                  |
| 25                                 | 20.14 $\pm$ 1.18                   | 164.24                                                      | 57.04 $\pm$ 2.01        | 21.07                                            |
| 50                                 | 29.47 $\pm$ 2.06                   |                                                             | 79.01 $\pm$ 0.61        |                                                  |
| 100                                | 44.73 $\pm$ 2.34                   |                                                             | 81.06 $\pm$ 0.51        |                                                  |
| 200                                | 51.97 $\pm$ 0.93                   |                                                             | 91.41 $\pm$ 1.29        |                                                  |

155
